# Supplementary material for: An mRNA vaccine elicits STING-dependent antitumor immune responses
Source: PubMed Central journal article supplement — Acta Pharm Sin B. 2022 Nov 17;13(3):1274–86. doi: 10.1016/j.apsb.2022.11.013 (PMC10031366; doi:10.1016/j.apsb.2022.11.013), 2022-11-17
Supplement: mmc1.pdf [file mmc1.pdf]

**Supporting Information for**

**ORIGINAL ARTICLE**

**An mRNA vaccine elicits STING-dependent antitumor  
immune responses**

Zhe Chen<sup>a,b</sup>, Chaoyang Meng<sup>a,c</sup>, Junhua Mai<sup>a</sup>, Yongbin Liu<sup>a</sup>, Hangwen Li<sup>d</sup>, Haifa Shen<sup>a,e,\*</sup>

<sup>a</sup>*Department of Nanomedicine, Houston Methodist Academic Institute, Houston, TX 77030, USA*

<sup>b</sup>*Xiangya Hospital of Central South University, Changsha 410000, China*

<sup>c</sup>*Department of Hepatobiliary and Pancreatic Surgery, First Affiliated Hospital, Zhejiang University School of Medicine, Hangzhou 310003, China*

<sup>d</sup>*Stemirna Therapeutics, Shanghai 201206, China*

<sup>e</sup>*ImmunoQ Therapeutics, Houston, TX 77401, USA*

Received 4 July 2022; received in revised form 13 September 2022; accepted 28 September 2022

\* Current address: Stemirna Therapeutics, Shanghai 201206, China

\* Corresponding author.

E-mail address: haifashen@gmail.com (Haifa Shen).

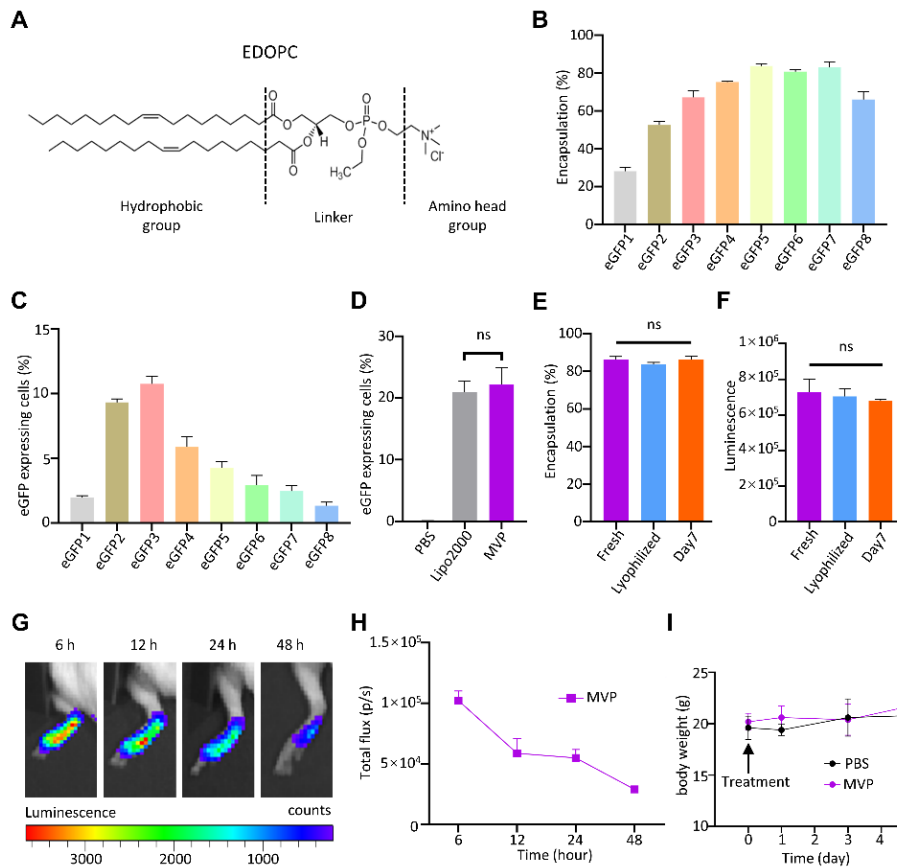

**Figure S1** Characterization of mRNA-encapsulated nanoparticles. (A) Chemical structure of EDOPC. (B) Percentage of eGFP mRNA encapsulation by nanoparticles prepared with different lipid compositions (details in Table 1). (C) eGFP expression in DC2.4 cells treated with eGFP mRNA-encapsulated nanoparticles. (D) eGFP expression in DC2.4 cells transfected with eGFP mRNA using Lipofectamine 2000 (Lipo2000: mRNA 3:1) or treated with MVP-encapsulated eGFP mRNA. (E) Encapsulation efficiency of MVP-encapsulated Luc mRNA. (F) Samples were either freshly prepared (Fresh), lyophilized (Lyophilized), or frozen at  $-20\text{ }^{\circ}\text{C}$  for 7 days (Day 7). (G and H) Time-dependent luciferase (Luc) expression in BALB/c mice treated with Luc mRNA-encapsulated MVP in the footpads. (I) Body weight change of BALB/c mice treated with PBS control or Luc mRNA-encapsulated MVP. Error bars: mean $\pm$ SEM ( $n=3$ ). ns, not significant.

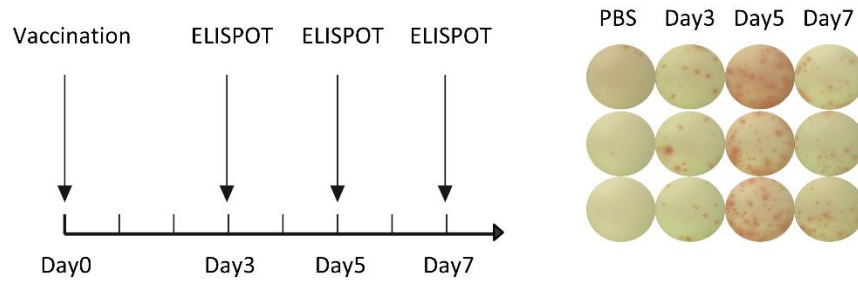

**Figure S2** ELISpot assay. C57BL/6J mice were treated with OVA mRNA-encapsulated MVP, and lymph nodes were collected at the indicated time points. Cells were isolated from the tissues, and applied for ELISpot analysis to measure IFN- $\gamma$ -expressing cells. Left panel: experimental design. Right panel: images of spots.

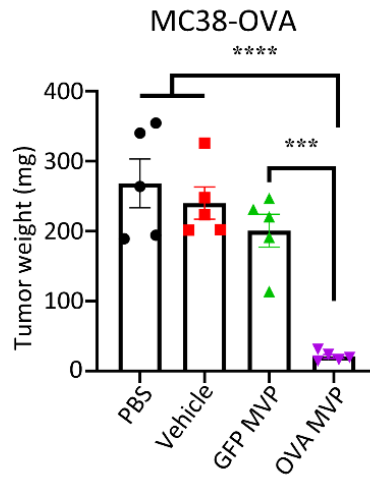

**Figure S3** Inhibition of MC38-OVA tumor growth. Female C57BL/6J mice were inoculated subcutaneously with  $5 \times 10^5$  MC38-OVA tumor cells/mouse on Day 0. They were treated with PBS control, mRNA-free vehicle control, GFP mRNA-encapsulated MVP, or OVA mRNA-encapsulated MVP on Days 3 and 10. Mice were euthanized on Day 13, and tumors were collected and weighed. Error bars: mean  $\pm$  SEM ( $n=5$ ). \*\*\*  $P < 0.005$ ; \*\*\*\*  $P < 0.001$ .

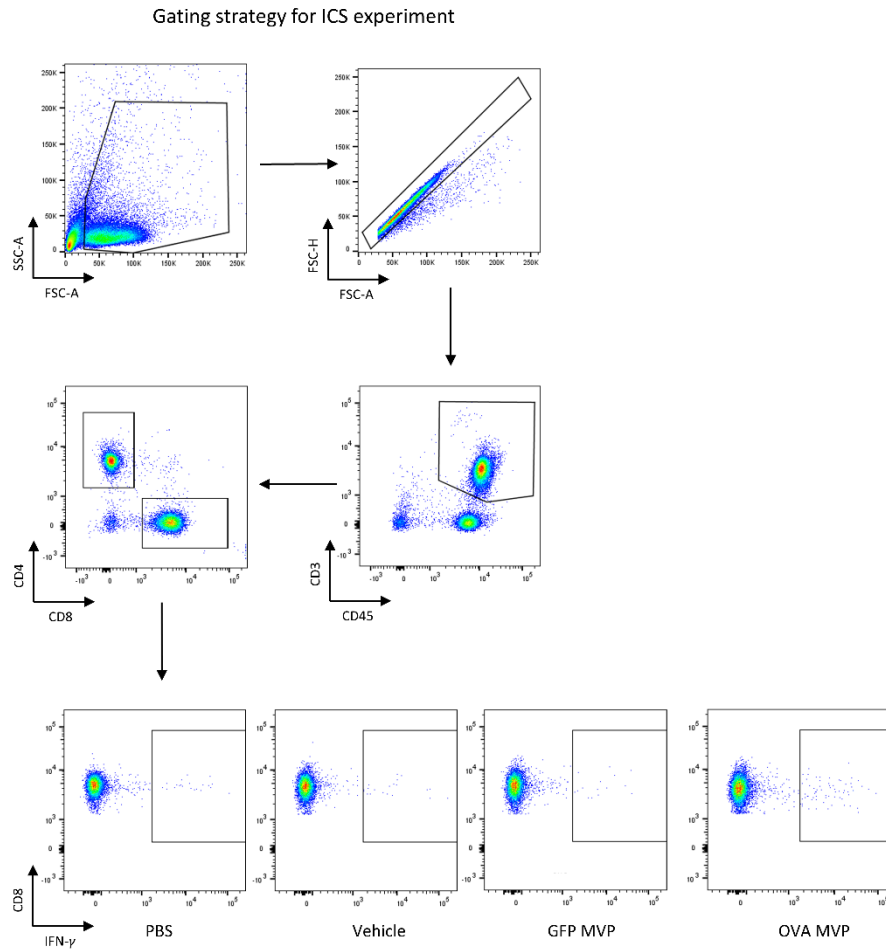

**Figure S4** Gating strategy for flow cytometry analysis of IFN- $\gamma$ -expressing T cells.

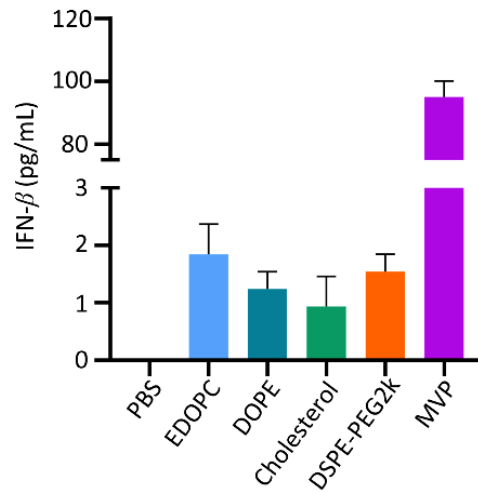

**Figure S5** IFN- $\beta$  expression in BMDCs treated with individual lipid components. BMDCs were treated either with 1 mg/mL mRNA-equivalent MVP (as positive control) or an equivalent dose of EDOPC, DOPE, cholesterol, or DSPE-PEG2k for 24 h. Cell growth media were collected to measure IFN- $\beta$  expression with ELISA. Error bars: mean $\pm$ SEM ( $n=3$ ).

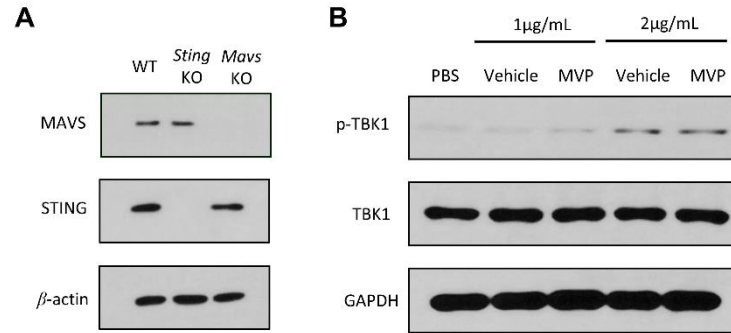

**Figure S6** Western blot analysis. (A) Western blot analysis on MAVS and STING expression in BMDCs collected from WT, *Sting* KO and *Mavs* KO mice. (B) Western blot analysis on TBK1 phosphorylation after BMDCs from WT mice were treated with PBS control, vehicle, or OVA mRNA-encapsulated MVP for 2 h.
